# Supplementary material
Source: publisher figshare collection journal article supplement (https://future-science-group.figshare.com/ndownloader/files/14652755)
Supplement: Supplementary file [file 14652755]

**Supplemental Western Blots (uncropped raw files)**

**(AUTHOR INFORMATION TO BE PLACED HERE AFTER REVIEW)**

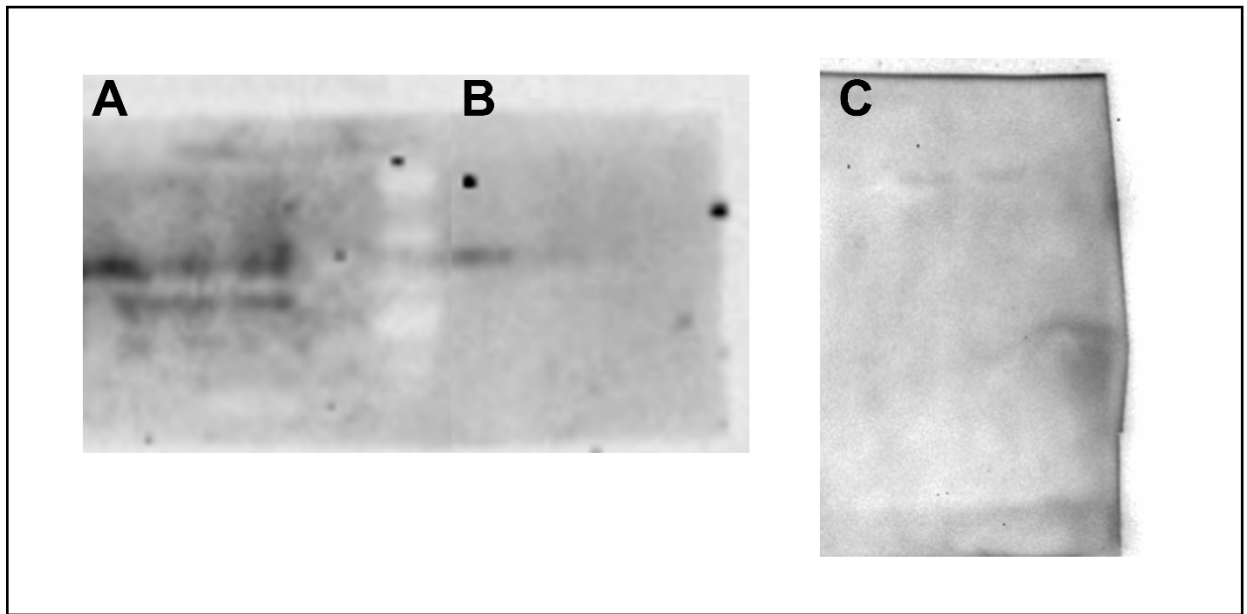

**Figure WB.1** Raw files from the WB with anti-CD81 of MDA-MB-231 cell lysates (**A**, n=3) and exosome samples isolated by UC (**B**, n=2) and kit (**C**, n=3)

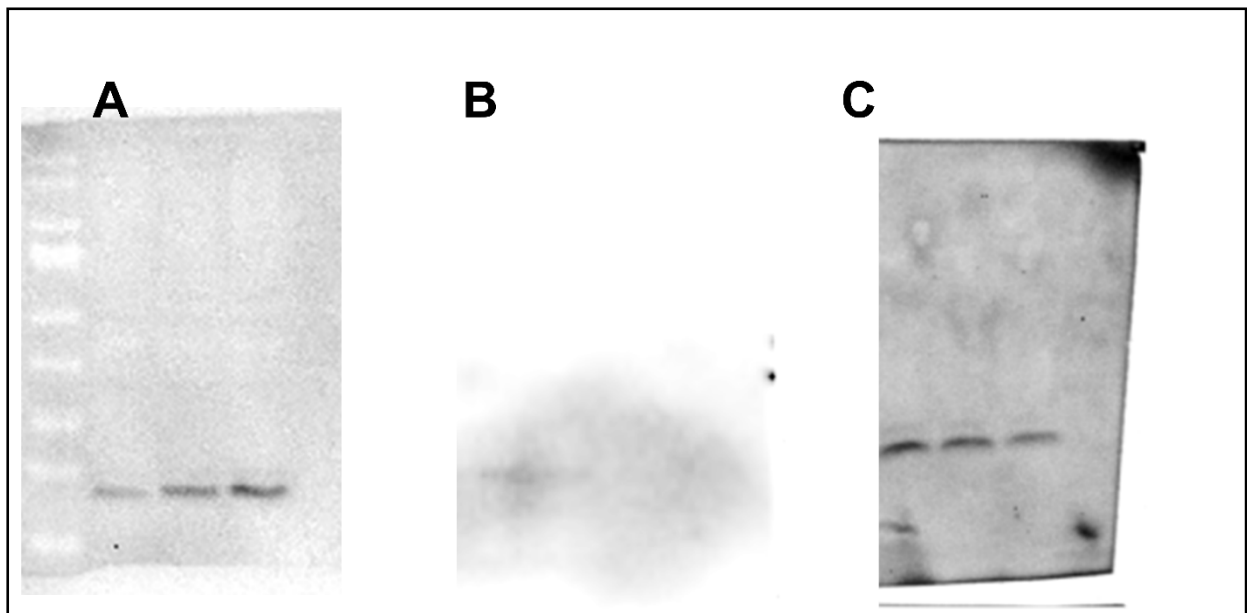

**Figure WB.2** Raw files from the WB with anti-CD9 of MDA-MB-231 cell lysates (**A**, n=3) and exosome samples isolated by UC (**B**, n=2) and kit (**C**, n=3).

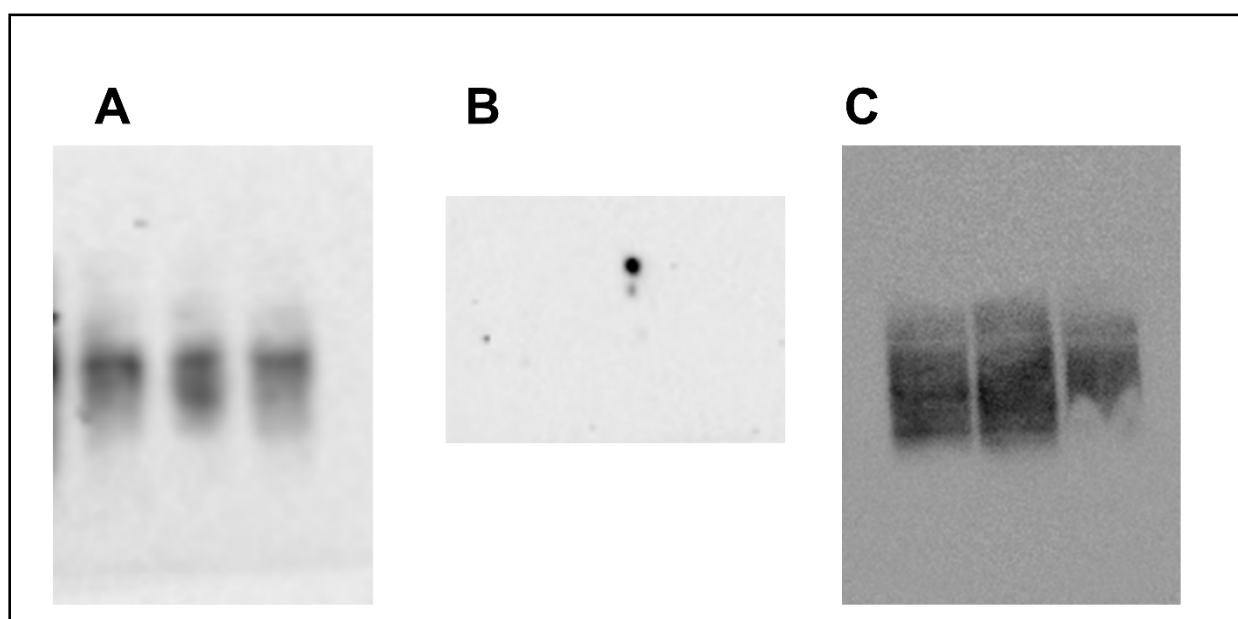

**Figure WB.3** Raw files from the WB with anti-CD63 of MDA-MB-231 cell lysates (**A**, n=3) and exosome samples isolated by UC (**B**, n=2) and kit (**C**, n=3)

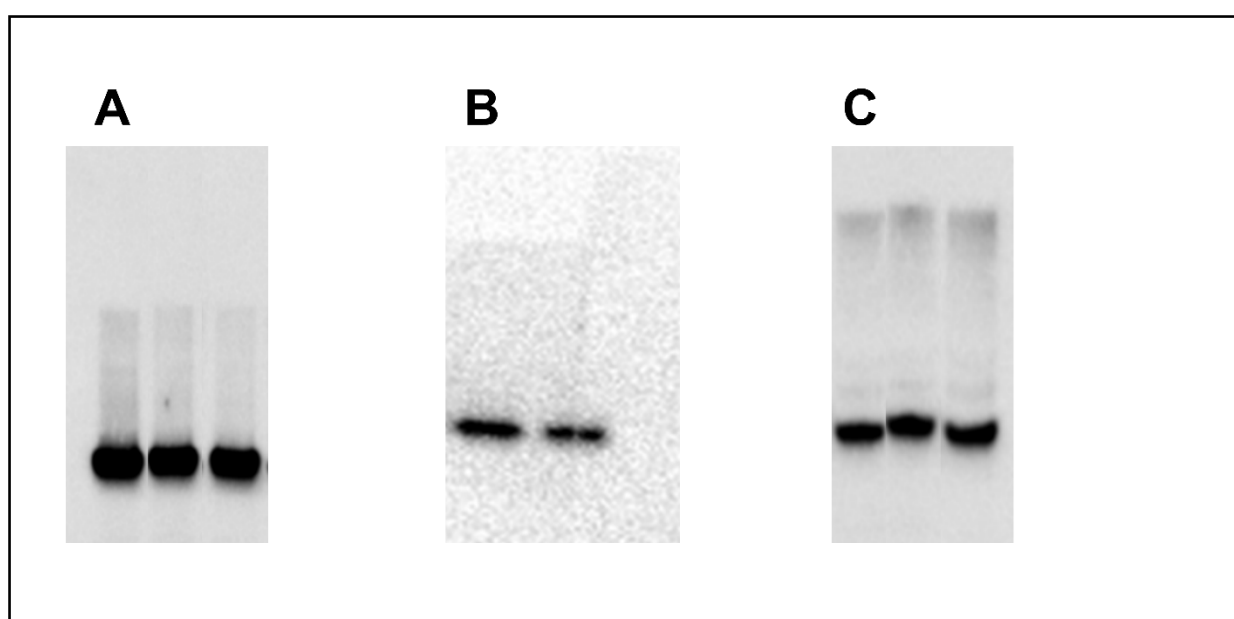

**Figure WB.4** Raw files from the WB with anti-TSG101 of MDA-MB-231 cell lysates (**A**, n=3) and exosome samples isolated by UC (**B**, n=2) and kit (**C**, n=3)

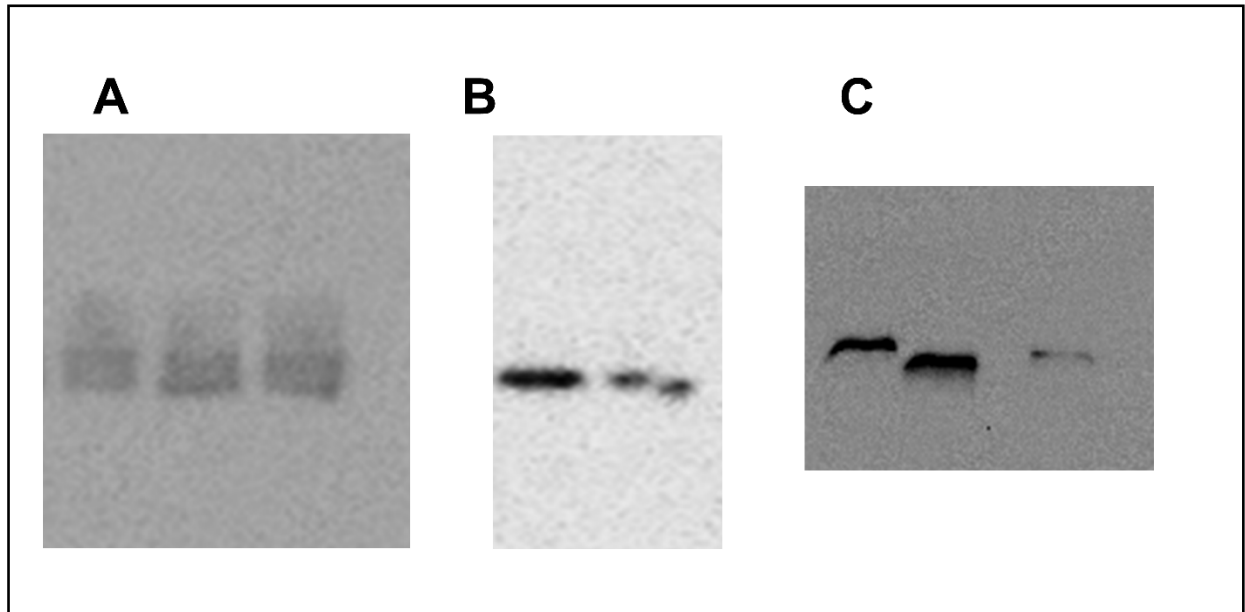

**Figure WB.5** Raw files from the WB with anti-flotillin-1 of MDA-MB-231 cell lysates (**A**, n=3) and exosome samples isolated by UC (**B**, n=2) and kit (**C**, n=3)

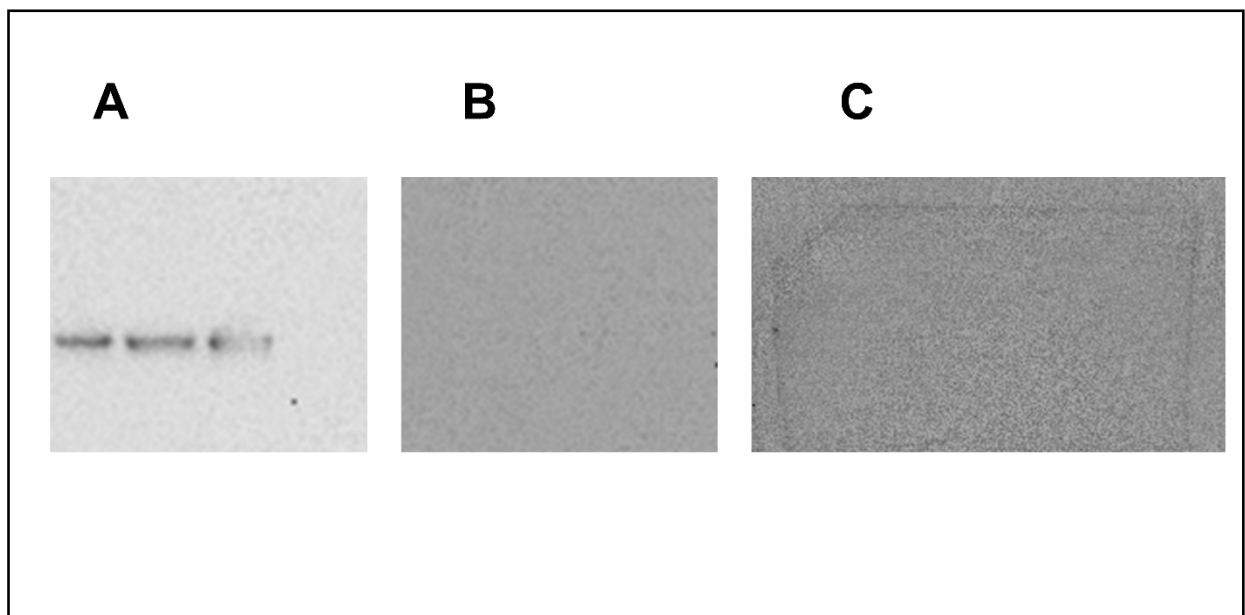

**Figure WB.6** Raw files from the WB with anti-calnexin of MDA-MB-231 cell lysates (**A**, n=3) and exosome samples isolated by UC (**B**, n=2) and kit (**C**, n=3)

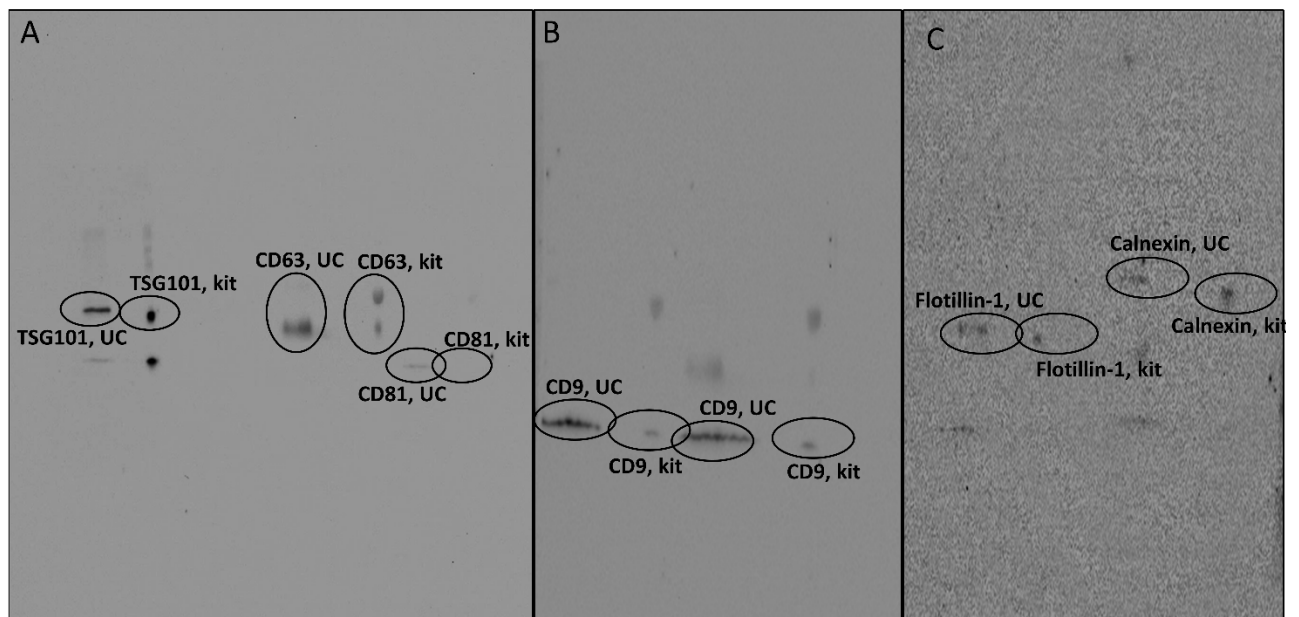

**Figure WB.7** Raw files from the WB of exosome markers from GBM exosomes. **A:** WB with anti-TSG101, anti-CD63 and anti-CD81 in kit- and UC samples (n=1). **B:** WB with anti-CD9 (n=2) in kit- and UC samples. **C:** WB with anti-flotillin-1 (n=1) and anti-calnexin (n=1) in kit- and UC samples.

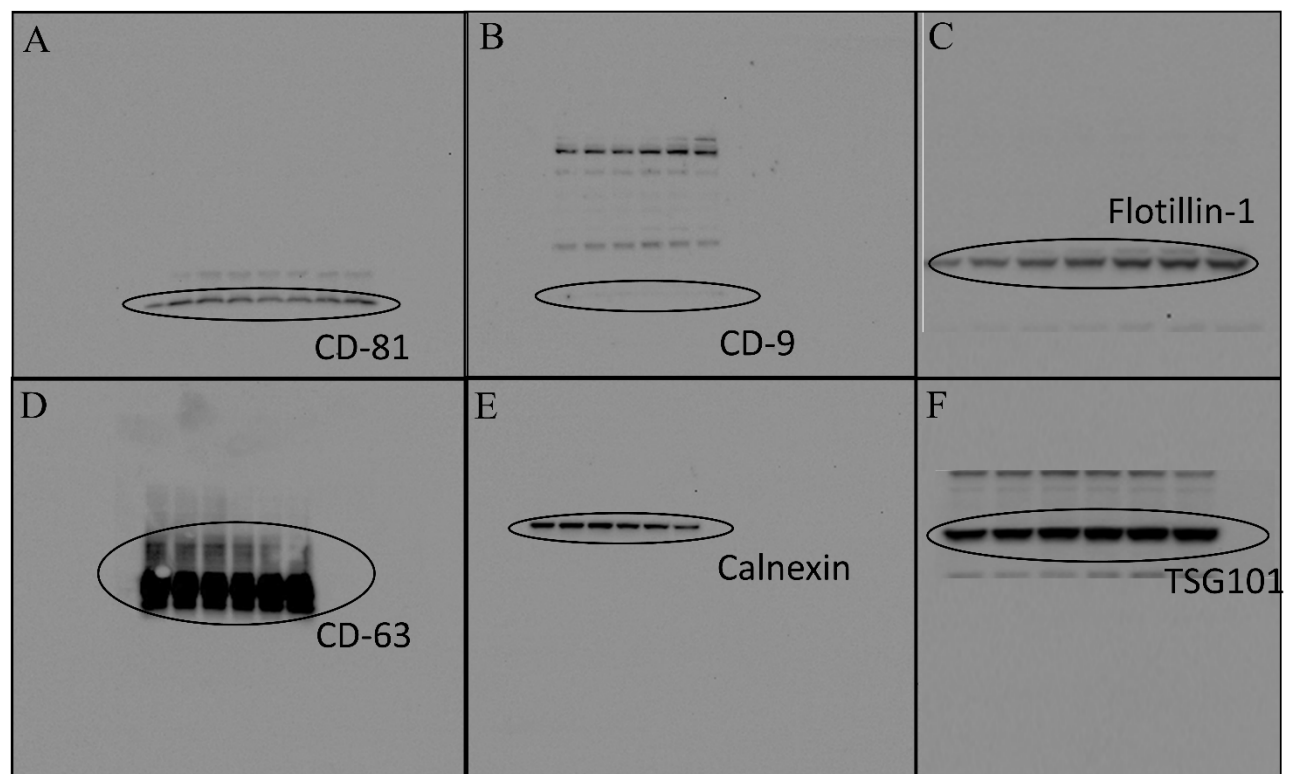

**Figure WB.8** Raw files of the WB of protein markers from GBM cells (n=6). **A:** WB with anti-CD81. **B:** WB with anti-CD9. **C:** WB with anti-flotillin-1. **D:** WB with anti-CD63. **E:** WB with anti-calnexin. **F:** WB with anti-TSG101.

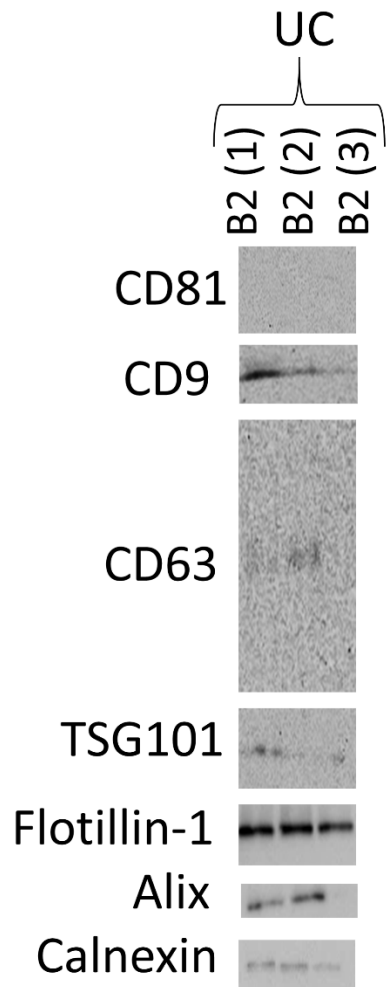

**Figure WB.9 Presence of exosome markers form GBM exosomes isolated by UC (second batch).** The protein markers CD81, CD9, CD63, TSG101, flotillin-1 (positive markers, +) and calnexin (negative marker, -) were targeted (n = 3). Monoclonal mouse antibodies were used for CD81, CD9, CD63, flotillin-1 and calnexin, while a polyclonal rabbit antibody was used for TSG101.
